# Supplementary material for: The role of interactions between the cationic backbone and basic anions in green and ultra-selective catalytic synthesis of ethyl methyl carbonate in tunable ionized frameworks
Source: Royal Society of Chemistry journal article supplement (doi:10.1039/d4gc02734e), 2024-01-01
Supplement: d4gc02734e1.pdf [file d4gc02734e1.pdf]

## Supporting Information

*for*

The role of interactions between cationic backbone and basic anions on green and ultra-selective catalytic synthesis of ethyl methyl carbonate in tunable ionized frameworks

Jie Chen <sup>a, b</sup>, Jingjun Xie <sup>a, b</sup>, Xiaoyan Chen <sup>a, b</sup>, Rong Dong <sup>d</sup>, Xue-hui Ge <sup>a, b, \*</sup> and Ting Qiu <sup>a, b, c, \*</sup>

<sup>a</sup> Engineering Research Center of Reactive Distillation, Fujian Province University, College of Chemical Engineering, Fuzhou University, Fuzhou, Fujian 350108, China;

<sup>b</sup> Qingyuan Innovation Laboratory, Fujian, Quanzhou 362801, China;

<sup>c</sup> Fuzhou University International Joint Laboratory of Thermochemical Conversion of Biomass, Fuzhou University, Fuzhou, Fujian 350108, China;

<sup>d</sup> College of Environment & Safety Engineering, Fuzhou University, Fuzhou, Fujian 350108, China.

\* Corresponding authors.

*E-mail addresses:* gexuehui@fzu.edu.cn (X. Ge), tingqiu@fzu.edu.cn. (T. Qiu)

S1 Supplementary Figure

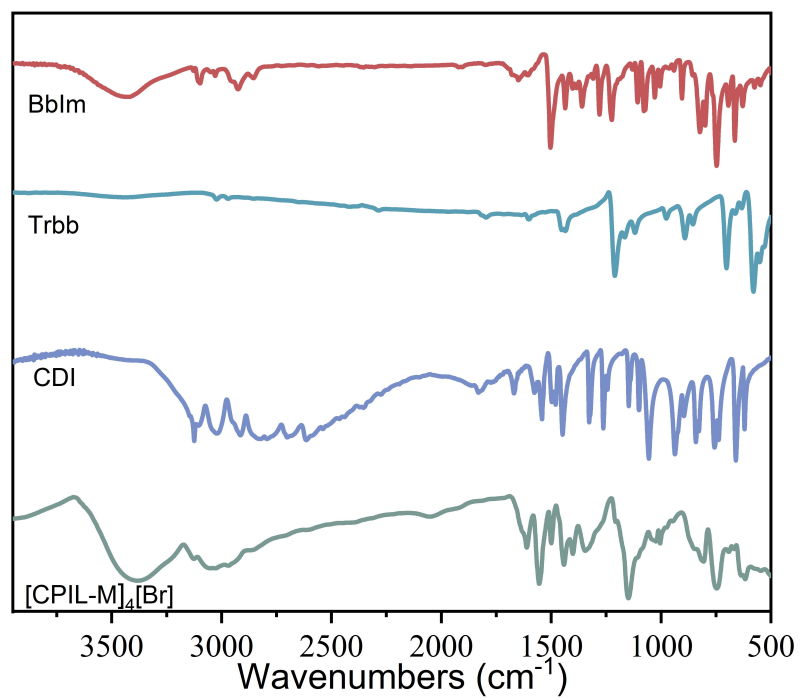

Fig. S1 FTIR spectra of Bblm, Trbb, CDI, and [CPIL-M]<sub>4</sub>[Br].

S2 Supplementary Figures

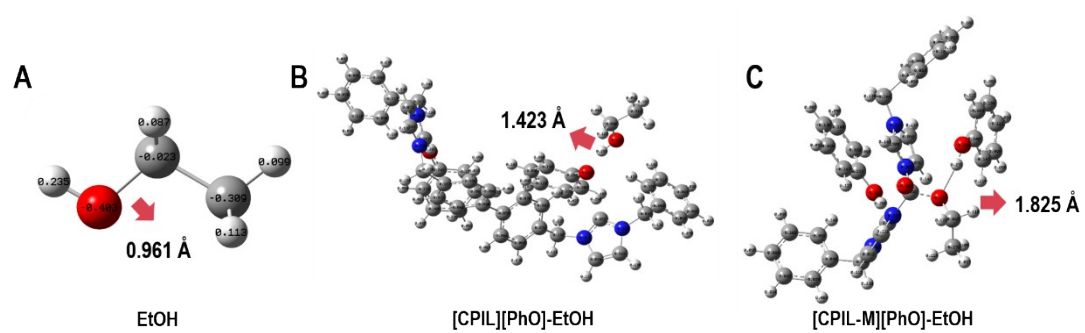

Fig. S2 Bond length of O-H on the hydroxyl of (A) pure ethanol, (B) ethanol interacted with [CPIL][PhO], and (C) ethanol interacted with [CPIL-M][PhO].

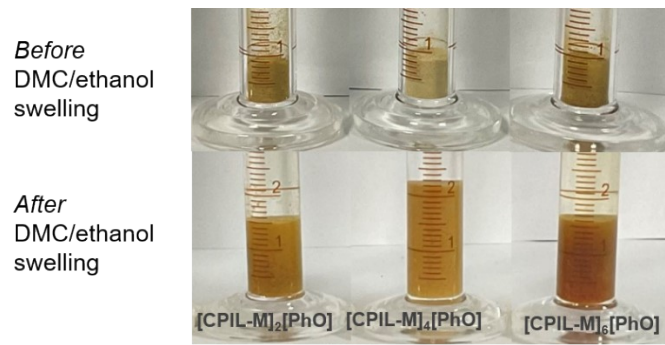

Fig. S3 Swelling properties of [CPIL-M]<sub>2</sub>[PhO], [CPIL-M]<sub>4</sub>[PhO] and [CPIL-M]<sub>6</sub>[PhO] in the DMC/ethanol mixture.

## S3 Supplementary Table

Table. S1 The basicity strength of [CPIL-M]<sub>4</sub>[Br] and [CPIL-M]<sub>n</sub>[PhO].

| Catalyst                                                                                                                                            | Basicity strength<br>(mmol g <sup>-1</sup> ) |
|-----------------------------------------------------------------------------------------------------------------------------------------------------|----------------------------------------------|
| [CPIL-M] <sub>4</sub> [Br]                                                                                                                          | -1.333 ± 0.428 <sup>a</sup>                  |
| [CPIL-M] <sub>2</sub> [PhO]                                                                                                                         | 1.538 ± 0.064                                |
| [CPIL-M] <sub>3</sub> [PhO]                                                                                                                         | 1.959 ± 0.084                                |
| [CPIL-M] <sub>4</sub> [PhO]                                                                                                                         | 2.591 ± 0.101                                |
| [CPIL-M] <sub>5</sub> [PhO]                                                                                                                         | 1.221 ± 0.047                                |
| <sup>a</sup> The [CPIL-M] <sub>4</sub> [Br] could perform an ionic exchange with OH, thus showing an acidic feature with a minus basicity strength. |                                              |

The basicity strength of [CPIL-M]<sub>4</sub>[Br] and [CPIL-M]<sub>1-6</sub>[PhO] was assessed through acid-base titration. Specifically, 0.1 g of [CPIL-M]<sub>4</sub>[Br] and [CPIL-M]<sub>1-6</sub>[PhO] were each dissolved in 10 mL of 0.1 mol L<sup>-1</sup> HCl and allowed to react fully for 5 hours at 298 K. Subsequently, 3 mL of the supernatant liquid and 3 drops of phenolphthalein indicator were titrated with 0.01 mol L<sup>-1</sup> NaOH until the color of the solution turned pink. The basicity strength of these PILs were calculated by the following formula,

$$\text{Basicity strength} = [(10\text{mL}/3\text{mL}) * (3\text{ mL} * 0.1\text{ mol L}^{-1} - V_{\text{NaOH}}\text{ mL} * 0.01\text{ mol L}^{-1})] / 0.1\text{ g}$$

Table. S2 The  $PMI_{RRC}^1$  of [CPIL-M]<sub>1-6</sub>[PhO] under the reaction condition of reaction temperature of 80 °C, reaction temperature of 6 h, ethanol/DMC molar ratio of 1:1, catalyst dosage of 1.7%.

| Catalyst                    | $PMI_{RRC}$<br>(g g <sup>-1</sup> ) |
|-----------------------------|-------------------------------------|
| [CPIL-M] <sub>1</sub> [PhO] | 3.825                               |
| [CPIL-M] <sub>2</sub> [PhO] | 3.791                               |
| [CPIL-M] <sub>3</sub> [PhO] | 3.426                               |
| [CPIL-M] <sub>4</sub> [PhO] | 2.768                               |
| [CPIL-M] <sub>5</sub> [PhO] | 3.903                               |
| [CPIL-M] <sub>6</sub> [PhO] | 3.831                               |

1.  $PMI_{RRC}$ : Process mass intensity: reactants, reagents, catalyst.
